# Supplementary material for: Degradation pathways of penthiopyrad by δ-MnO2 mediated processes: a combined density functional theory and experimental study
Source: Royal Society of Chemistry journal article supplement (doi:10.1039/d1em00339a), 2021-01-01
Supplement: d1em00339a1.pdf [file d1em00339a1.pdf]

Supplementary Information

**Degradation pathways of penthiopyrad by  $\delta$ -MnO<sub>2</sub> mediated processes: A combined density functional theory and experimental study**

Ruishuang Xu<sup>a,b</sup>; Mengjiu Zhao<sup>a</sup>; Zhengqiang Chen<sup>a</sup>; Zhihong Gao<sup>c</sup>; Haiyan Song<sup>a \*</sup>;  
Taicheng An<sup>d</sup>; Shengrun Zheng<sup>a</sup>; Fenglong Gu<sup>a,b \*</sup>

<sup>a</sup> School of Chemistry, South China Normal University, Guangzhou 510006, PR China.

<sup>b</sup> Key Laboratory of Theoretical Chemistry of Environment, Ministry of Education; School of Chemistry, South China Normal University, Guangzhou 510006, PR China.

<sup>c</sup> Analysis and Testing Center, South China Normal University, Guangzhou 510006, PR China.

<sup>d</sup> Guangzhou Key Laboratory of Environmental Catalysis and Pollution Control, School of Environmental Science and Engineering, Institute of Environmental Health and Pollution Control, Guangdong University of Technology, Guangzhou 510006, PR China.

\* Corresponding author: Haiyan Song; Fenglong Gu

E-mail: songhaiyan@m.scnu.edu.cn; gu@scnu.edu.cn

Tel.: 86-20-39310253; Fax: 86-20-39310187

**This supplementary information include:**

1) Text S1 Fukui function

2) Figures:

Fig. S1. X-ray diffraction pattern of the synthesized  $\delta$ -MnO<sub>2</sub>.

Fig. S2. FTIR spectra of the synthesized  $\delta$ -MnO<sub>2</sub>.

Fig. S3. N<sub>2</sub> adsorption-desorption isothermals and pore-size distribution curves of the synthesized  $\delta$ -MnO<sub>2</sub>.

Fig. S4. The Mn 2p<sub>3/2</sub> XPS spectra of the synthesized  $\delta$ -MnO<sub>2</sub>.

Fig. S5. SEM patterns of the flower-shape  $\delta$ -MnO<sub>2</sub>.

Fig. S6. Effect of MnO<sub>2</sub> concentration on *S* and *k*.

Fig. S7. Identification of P1 (m/z 390.1105) and its MS<sup>1</sup>, MS<sup>2</sup> spectra.

Fig. S8. Identification of P2 (m/z 388.0948) and its MS<sup>1</sup>, MS<sup>2</sup> spectra.

Fig. S9. Identification of P3 (m/z 376.1301) and its MS<sup>1</sup>, MS<sup>2</sup> spectra.

Fig. S10. Identification of P4 (m/z 392.1250) and its MS<sup>1</sup>, MS<sup>2</sup> spectra.

Fig. S11. Identification of P5 (m/z 199.0798) and its MS<sup>1</sup>, MS<sup>2</sup> spectra.

Fig. S12. Identification of P6 (m/z 194.0536) and its MS<sup>1</sup>, MS<sup>2</sup> spectra.

Fig. S13. Identification of P7 (m/z 193.0238) and its MS<sup>1</sup>, MS<sup>2</sup> spectra.

Fig. S14. Effect of solution pH on penthiopyrad degradation.

Fig. S15. (a) Zeta potential and the oxidation potential of  $\delta$ -MnO<sub>2</sub> in different solution pH; (b) the oxidation potential of  $\delta$ -MnO<sub>2</sub> in different solution pH.

Fig. S16. (a) Effect of temperature on penthiopyrad degradation ; (b) Plot of  $k \cdot 10^{-3}$  versus  $1/T$  for activated energy calculation

Fig. S17. Effect of metal cations on penthiopyrad degradation .

Fig. S18. (a) Effect of humic acid on penthiopyrad degradation; (b) FTIR spectra of the humic acid.

## S1. Fukui function

Fukui function has been widely used to predict the reactive sites of electrophilic, nucleophilic, and radical attacking (Kong et al., 2020; Parr and Yang, 1984).

Specifically, Fukui function is defined as:

$$f(r) = \left[ \frac{\partial \mu}{\partial v(r)} \right]_N = \left[ \frac{\partial \rho(r)}{\partial N} \right]_{v(r)} \quad (1)$$

where  $\rho(r)$  is the electron density at a point  $r$  in space,  $N$  is electron number in present system, the constant term  $v$  in the partial derivative is external potential. In the condensed version of Fukui function, atomic population number is used to represent the amount of electron density distribution around an atom. The condensed Fukui function can be calculated unambiguously for three situations:

$$\text{Nucleophilic attack: } f_A^+ = q_N^A - q_{N+1}^A \quad (2)$$

$$\text{Electrophilic attack: } f_A^- = q_{N-1}^A - q_N^A \quad (3)$$

$$\text{Radical attack: } f_A^0 = (q_{N-1}^A - q_{N+1}^A)/2 \quad (4)$$

where  $q^A$  is the atom charge population of atom  $A$  at corresponding state. The Fukui function contains relative information about different sites of one molecule, and the reactive sites of the exact molecule usually have larger value of condensed Fukui function (CFF) than other regions.

## References:

- Kong, W., Gao, Y., Yue, Q., Li, Q., Gao, B., Kong, Y., Wang, X., Zhang, P. and Wang, Y., 2020. Performance optimization of CdS precipitated graphene oxide/polyacrylic acid composite for efficient photodegradation of chlortetracycline. *J. Hazard. Mater.* 388, 121780.  
<https://doi.org/10.1016/j.jhazmat.2019.121780>
- Parr, Robert G. and Yang, W., 1984. Density functional approach to the frontier-electron theory of chemical reactivity. *J. Am. Chem. Soc.* 106, 4049-4050.  
<https://doi.org/10.1021/ja00326a036>

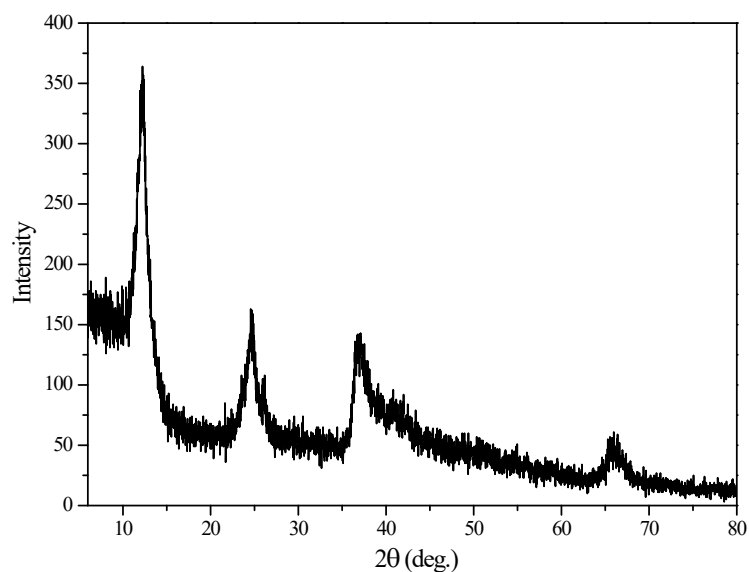

**Fig. S1.** X-ray diffraction pattern of the synthesized  $\delta$ -MnO<sub>2</sub>.

X-ray diffraction (XRD) determined the phase structures of the synthesized MnO<sub>2</sub> was present in Fig. S1. The diffraction peaks could be observed at  $2\theta = 12.3$ ,  $24.6$ , and  $36.9$ , which is precisely similar to that of  $\delta$ -MnO<sub>2</sub> (Zhong et al. 2019), and the synthesized  $\delta$ -MnO<sub>2</sub> sample was low crystallized.

#### References:

Zhong, C., Zhao, H., Cao, H., Fu, J., Xie, Y. and Sun, Z., 2019. Acidity induced fast transformation of acetaminophen by different MnO<sub>2</sub>: Kinetics and pathways. Chem. Eng. J. 359, 518-529. <https://doi.org/10.1016/j.cej.2018.11.172>.

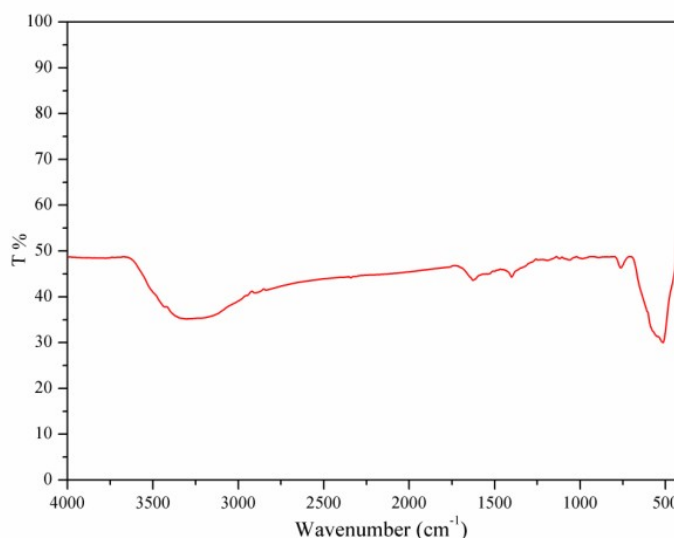

**Fig. S2.** FTIR spectra of the synthesized  $\delta$ -MnO<sub>2</sub>.

The functional groups of  $\delta$ -MnO<sub>2</sub> was characterized in Fig.S2. The characteristic stretching vibration peak of the O-Mn-O bond appears near the wavenumber 510 cm<sup>-1</sup> in FT-IR spectra , which confirms the existence of the MnO<sub>2</sub> unit cell (Li et al., 2017). The typical absorption band in the wavenumber range of 3600 to 3000 cm<sup>-1</sup> corresponded to the stretching of O-H in water molecules and Mn-OH groups, and the absorption peak at 1624 cm<sup>-1</sup> represents the bending vibration of Mn-OH. The simultaneous appearance of these peaks indicates that the sample contains bound water molecules.

### References:

Li, L., Wei, D., Wei, G. and Du, Y., 2017. Product identification and the mechanisms involved in the transformation of cefazolin by birnessite ( $\delta$ -MnO<sub>2</sub> ). Chem. Eng. J. 320, 116-123. <https://doi.org/10.1016/j.cej.2017.03.021>

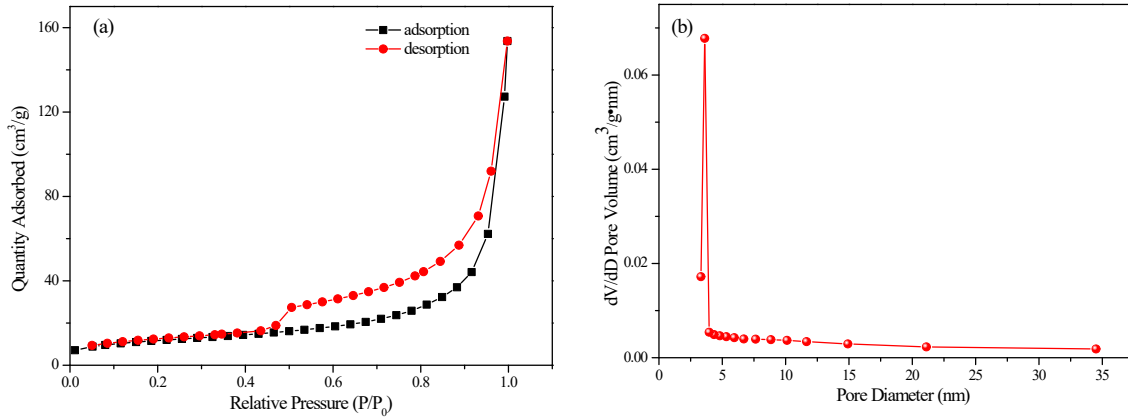

**Fig. S3.** N<sub>2</sub> adsorption-desorption isotherms and pore-size distribution curves of the  $\delta$ -MnO<sub>2</sub>.

The surface areas of the synthesized  $\delta$ -MnO<sub>2</sub> was determined by N<sub>2</sub> adsorption-desorption isotherms in Fig. S3. The adsorption-desorption isotherms for the  $\delta$ -MnO<sub>2</sub> sample was given in Fig. S3 (a), the Brunauer-Emmett-Teller (BET) surface area of the sample is determined to be 40.92 m<sup>2</sup>/g. As shown in Fig. S3 (b), the pore size distribution was measured from the isotherm by the BJH model, which indicated that the narrow distribution is around mesopore region.

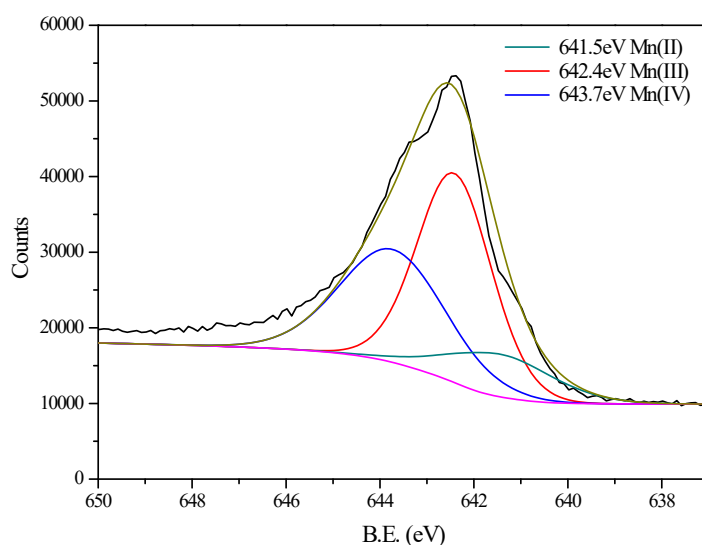

**Fig. S4.** The Mn 2p<sub>3/2</sub> XPS spectra of the synthesized  $\delta$ -MnO<sub>2</sub>.

Fig. S4 shows the Mn 2p<sub>3/2</sub> XPS spectra of the synthesized  $\delta$ -MnO<sub>2</sub>. The Mn 2p<sub>3/2</sub> peak were deconvoluted into three peaks: Mn(IV) at 643.7 eV, Mn(III) at 642.4 eV and Mn(II) 641.5 eV according to reference (Zhong et al. 2019), the relative Mn content of different oxidation states was 37%, 49% and 14%, which indicated that Mn(III) > Mn(IV) >> Mn(II).

#### References:

Zhong, C., Zhao, H., Cao, H., Fu, J., Xie, Y. and Sun, Z., 2019. Acidity induced fast transformation of acetaminophen by different MnO<sub>2</sub>: Kinetics and pathways. Chem. Eng. J. 359, 518-529. <https://doi.org/10.1016/j.cej.2018.11.172>.



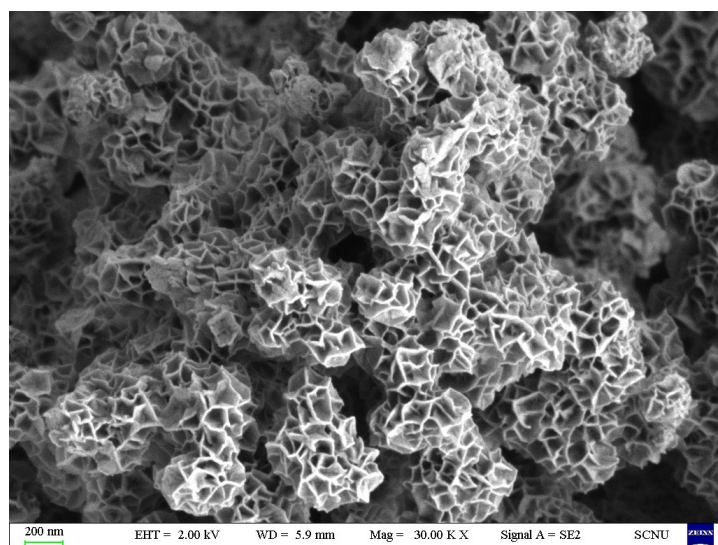

**Fig. S5.** SEM patterns of the flower-shape  $\delta$ -MnO<sub>2</sub>.

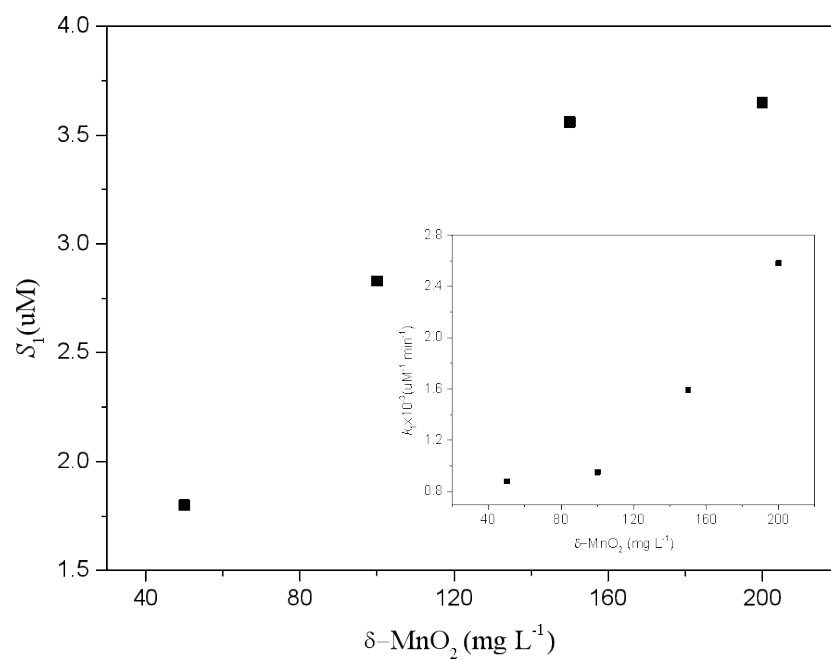

**Fig. S6.** Effect of  $\delta$ -MnO<sub>2</sub> concentration on  $S_1$  and  $k_1$ .

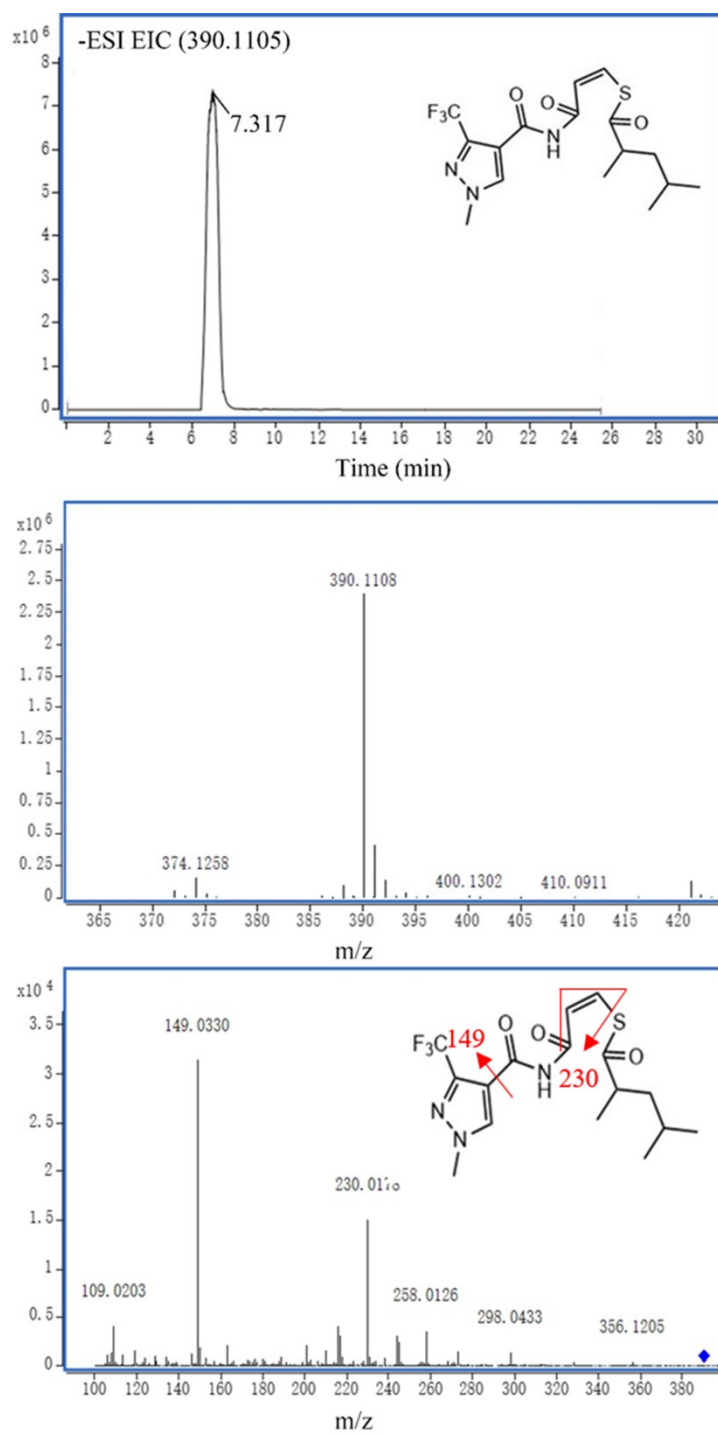

**Fig. S7.** Identification of P1 (m/z 390.1105) and its MS<sup>1</sup>, MS<sup>2</sup> spectra.

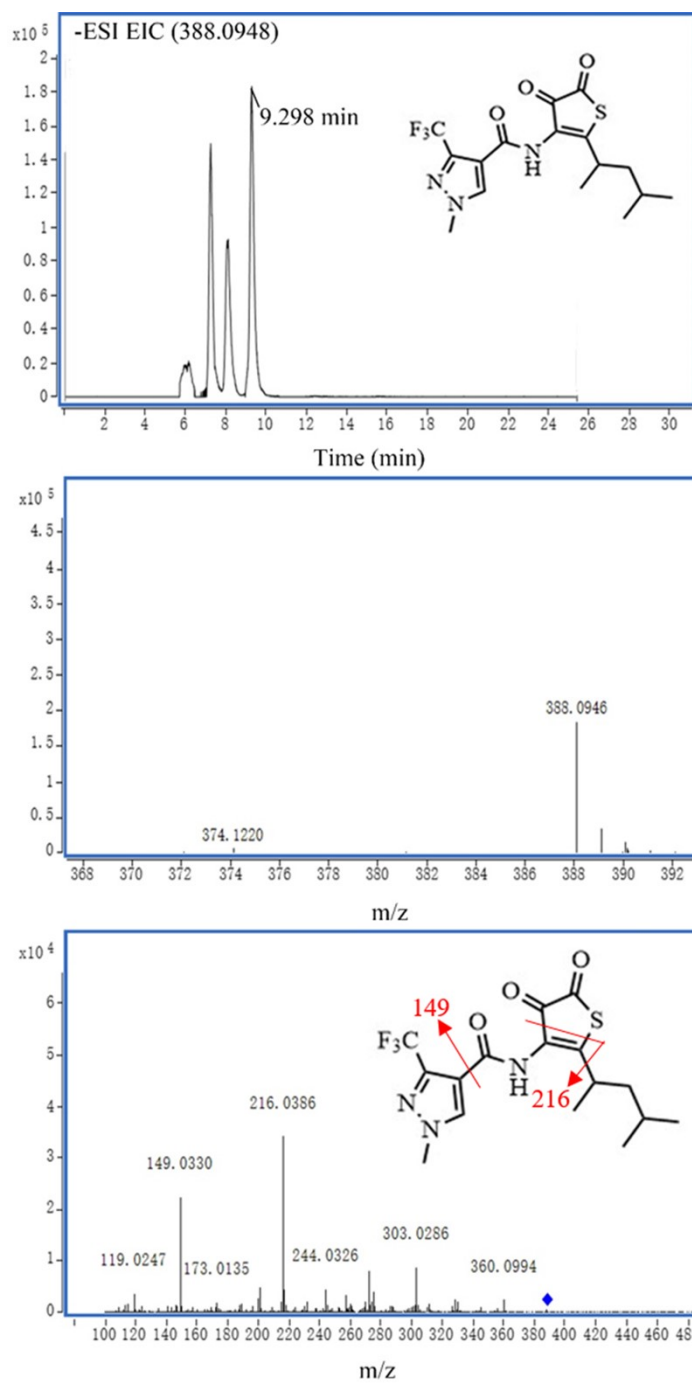

**Fig. S8.** Identification of P2 (m/z 388.0948) and its MS<sup>1</sup>, MS<sup>2</sup> spectra.

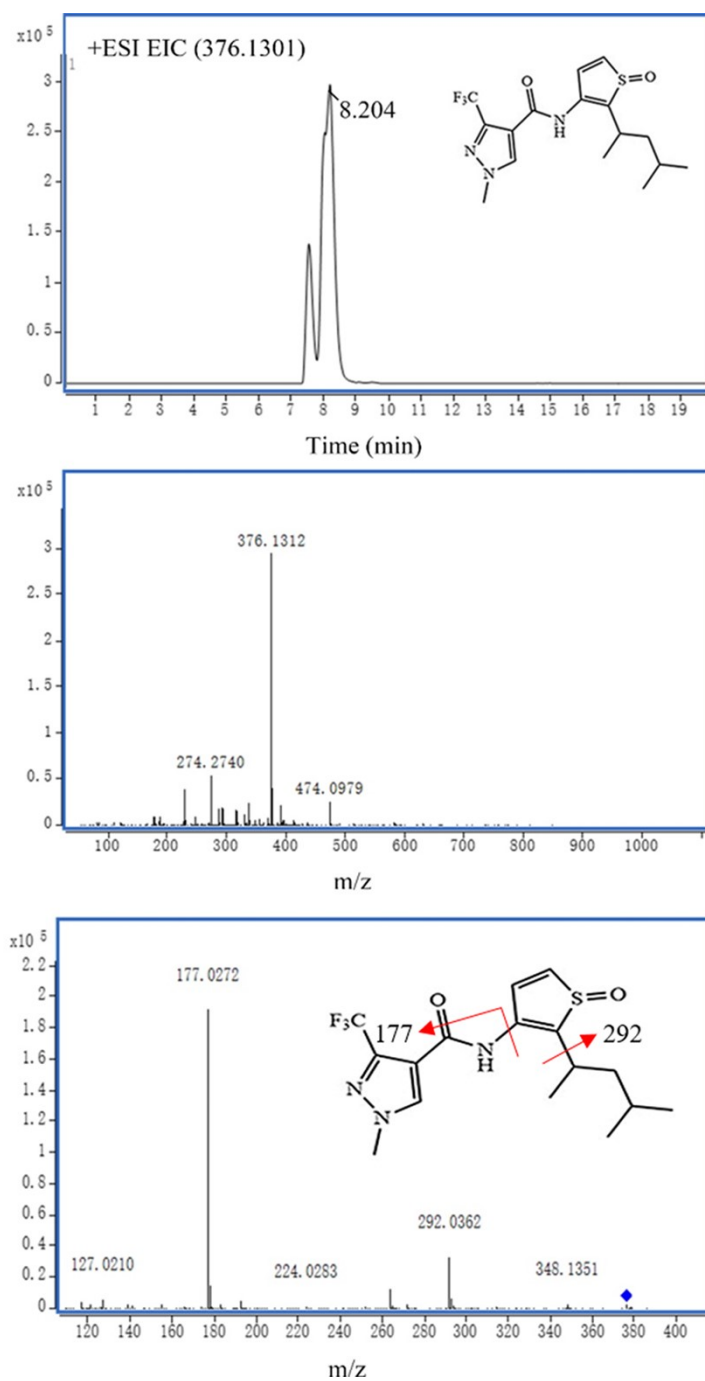

**Fig. S9.** Identification of P3 (m/z 376.1301) and its MS<sup>1</sup>, MS<sup>2</sup> spectra.

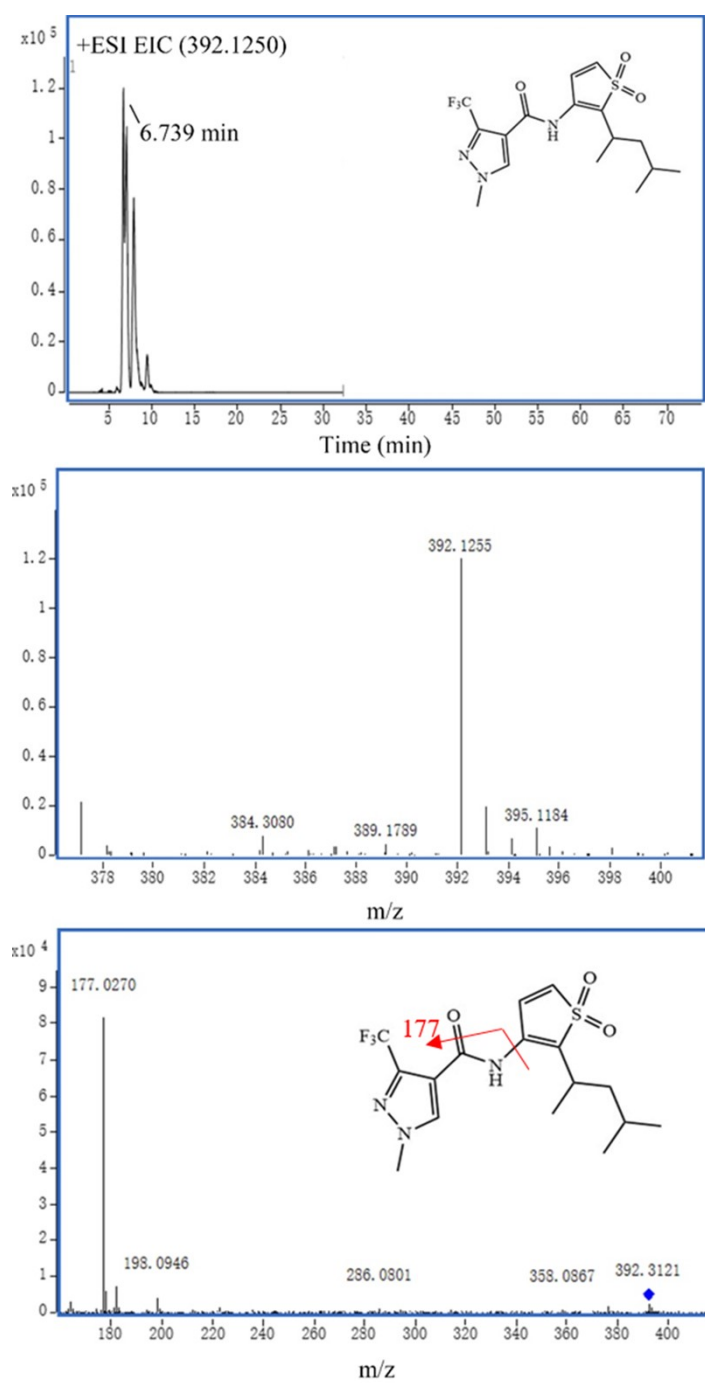

**Fig. S10.** Identification of P4 ( $m/z$  392.1250) and its MS<sup>1</sup>, MS<sup>2</sup> spectra.

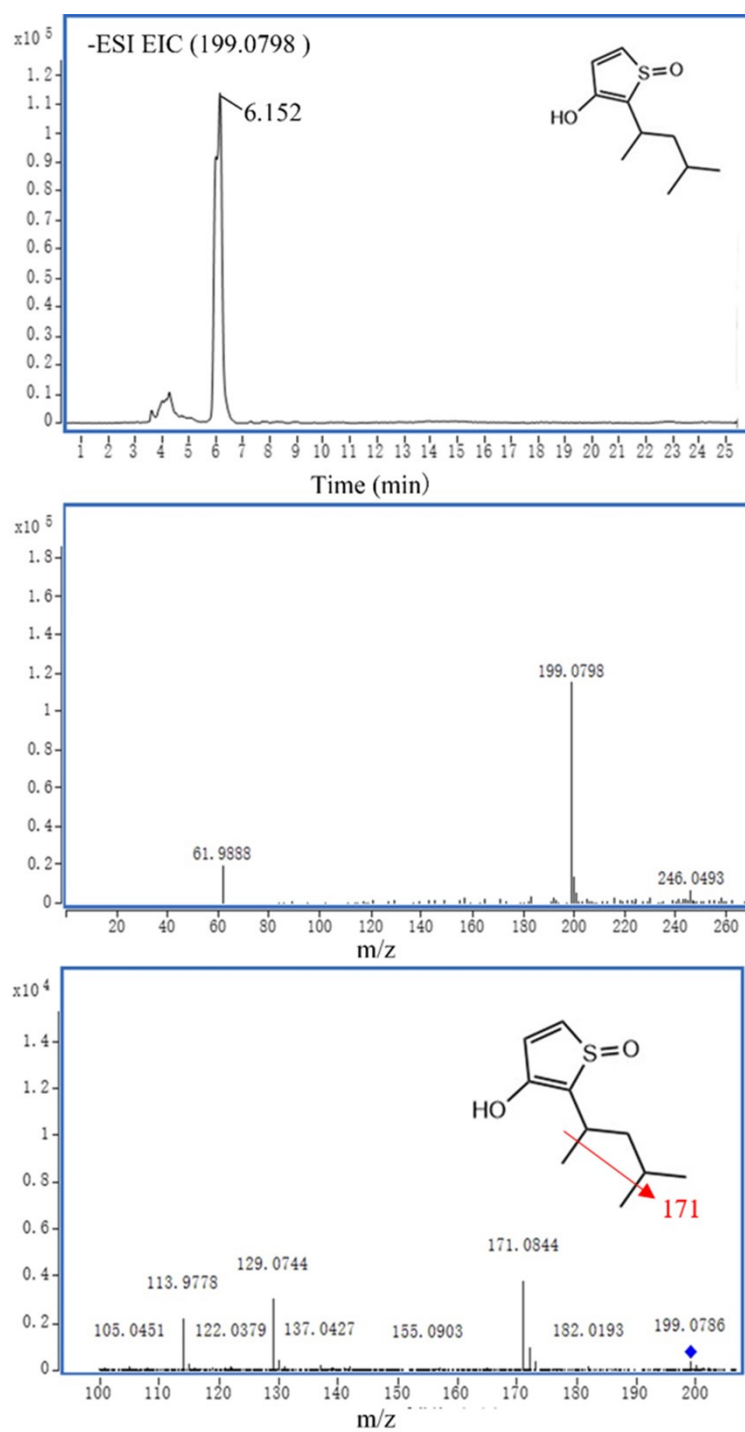

**Fig. S11.** Identification of P5 ( $m/z$  199.0798) and its MS<sup>1</sup>, MS<sup>2</sup> spectra.

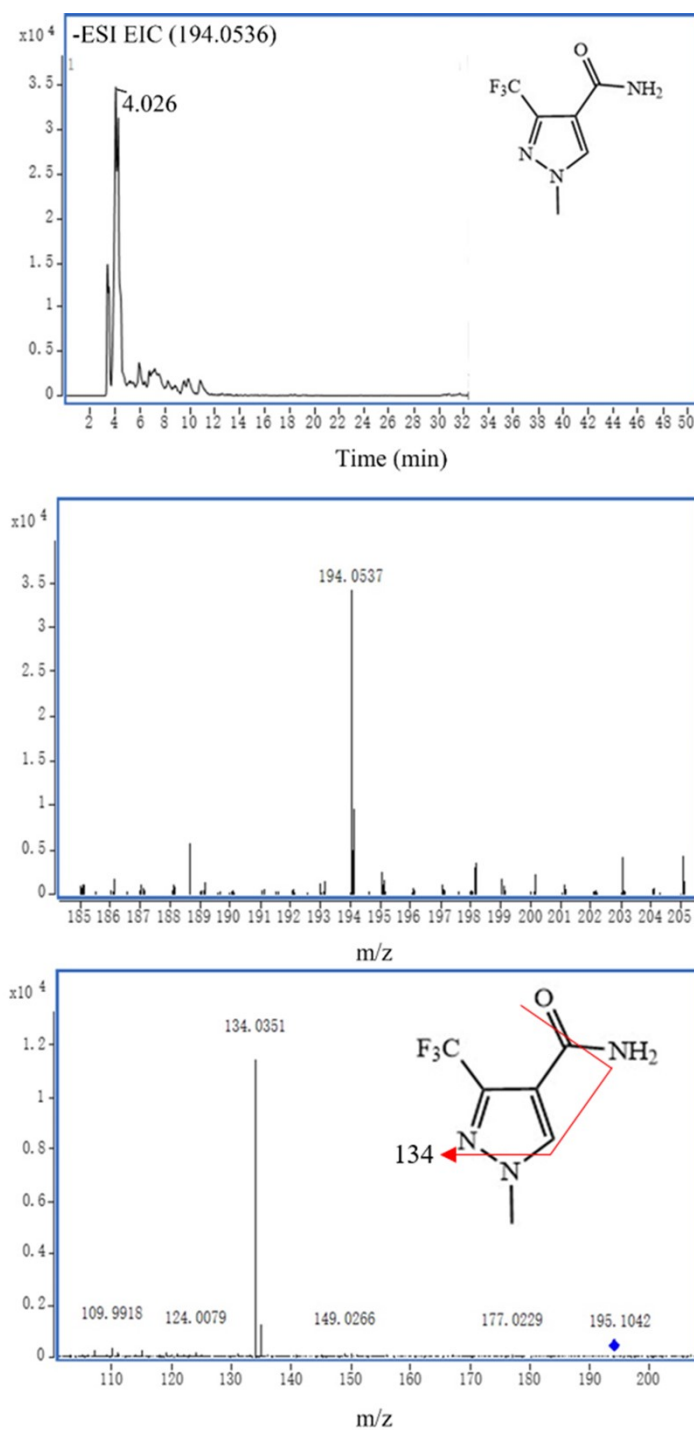

**Fig. S12.** Identification of P6 (m/z 194.0536) and its MS<sup>1</sup>, MS<sup>2</sup> spectra.

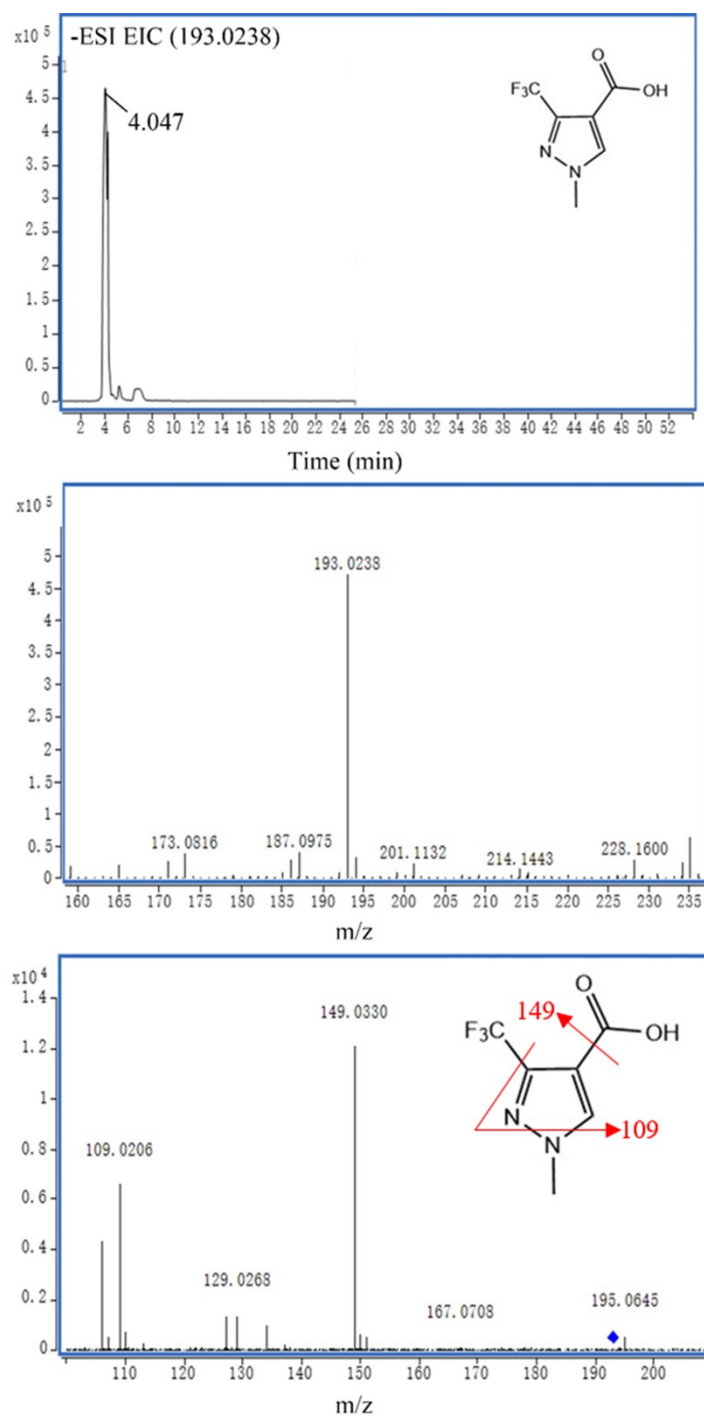

**Fig. S13.** Identification of P7 ( $m/z$  193.0238) and its MS<sup>1</sup>, MS<sup>2</sup> spectra.



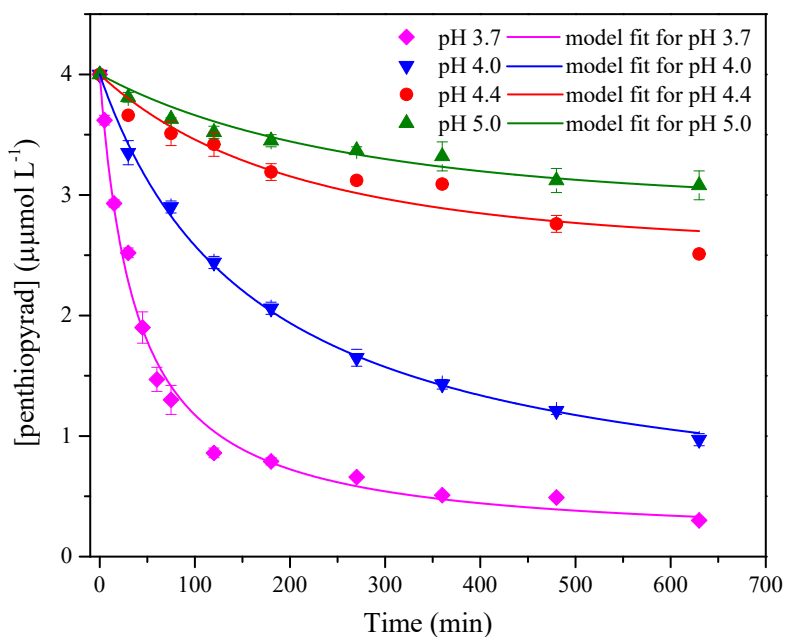

**Fig. S14.** Effect of solution pH on penthiopyrad degradation ( $[\text{penthiopyrad}]_0 = 4 \mu\text{mol L}^{-1}$ ,  $[\delta\text{-MnO}_2]_0 = 150 \text{ mg L}^{-1}$ , pH 3.7–5.0,  $[\text{NaCl}]_0 = 10 \text{ mmol L}^{-1}$ ).

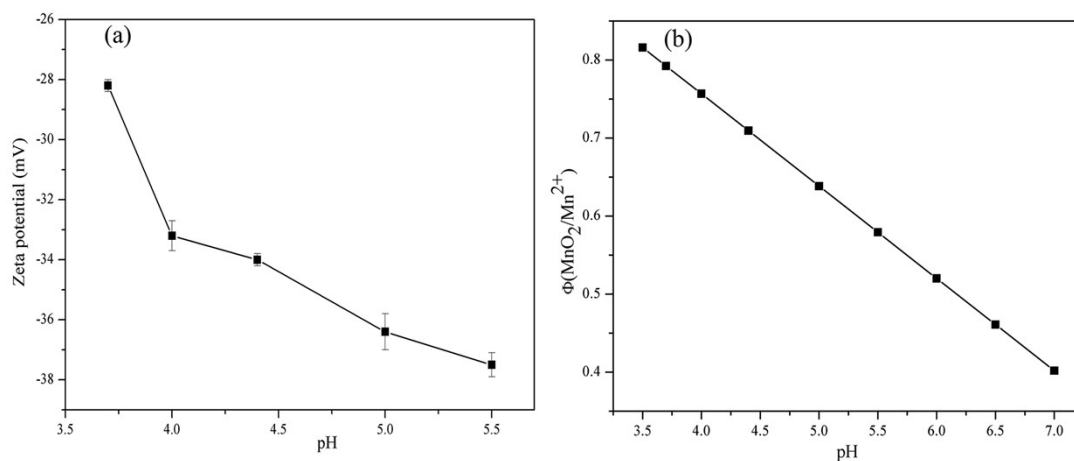

**Fig. S15.** (a) Zeta potential and the oxidation potential of  $\delta\text{-MnO}_2$  in different solution pH. (b) the oxidation potential of  $\delta\text{-MnO}_2$  in different solution pH.

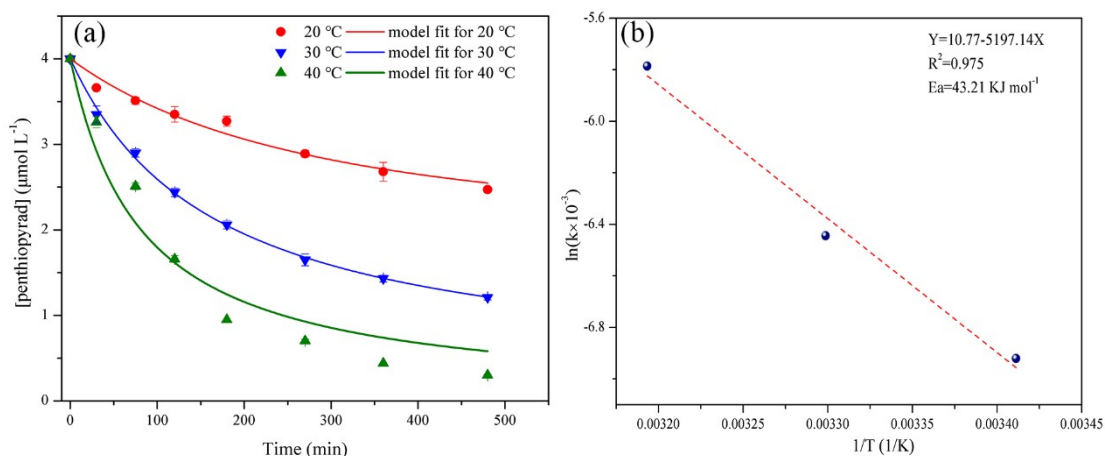

**Fig. S16.** Effect of temperature on penthiopyrad degradation ( $[\text{penthiopyrad}]_0 = 4 \mu\text{mol L}^{-1}$ ,  $[\delta\text{-MnO}_2]_0 = 150 \text{ mg L}^{-1}$ ,  $\text{pH}=4$ ,  $[\text{NaCl}]_0 = 10 \text{ mmol L}^{-1}$ ); (b) Plot of  $k$  versus  $1/T$  for activated energy calculation

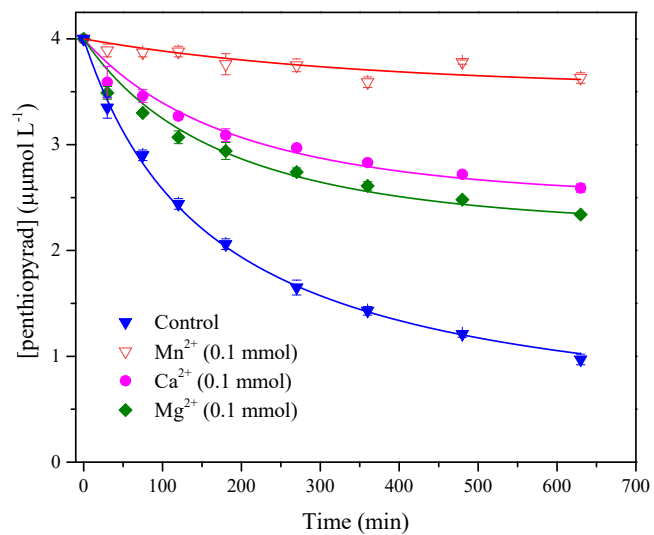

**Fig. S17.** Effect of metal cations on penthiopyrad degradation ( $[\text{penthiopyrad}]_0 = 4 \mu\text{mol L}^{-1}$ ,  $[\delta\text{-MnO}_2]_0 = 150 \text{ mg L}^{-1}$ ,  $\text{pH}=4$ ,  $[\text{NaCl}]_0 = 10 \text{ mmol L}^{-1}$ ).

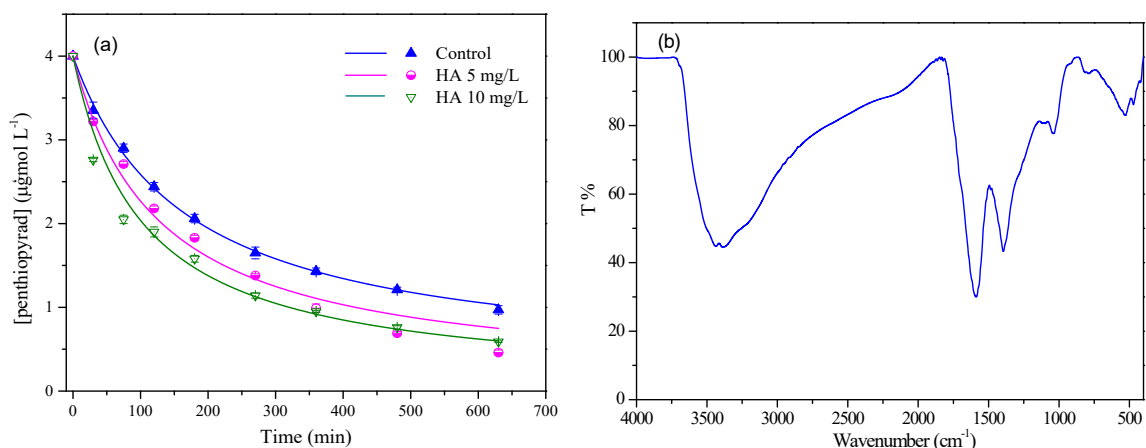

**Fig. S18.** (a) Effect of humic acid on penthiopyrad degradation ( $[\text{penthiopyrad}]_0 = 4 \mu\text{mol L}^{-1}$ ,  $[\delta\text{-MnO}_2]_0 = 150 \text{ mg L}^{-1}$ ,  $\text{pH}=4$ ,  $[\text{NaCl}]_0 = 10 \text{ mmol L}^{-1}$ ). (b) FTIR spectra of the humic acid.

The Fig. S18b shown the FTIR spectra of the humic acid. The sharp peaks appearing in the band of  $1132\sim 700 \text{ cm}^{-1}$  in the fingerprint area mainly correspond to the stretching vibrations of C-O in the carboxylic acid, alcohol, ester and phenolic hydroxyl groups. Combined with the C=O and aromatic ring structures appearing at  $1705\sim 1300 \text{ cm}^{-1}$  and the elements in the element analysis high C and O content, which indicated that humic acid contained more carboxyl groups and phenolic hydroxyl groups.
